# Supplementary material for: Single-source-precursor synthesis of dense SiC/HfCxN1−x-based ultrahigh-temperature ceramic nanocomposites
Source: Royal Society of Chemistry journal article supplement (doi:10.1039/c4nr03376k), 2014-01-01
Supplement: c4nr03376k1.pdf [file c4nr03376k1.pdf]

2<sup>nd</sup>-Revised SI: NR-ART-06-2014-003376.R1

## Supplementary Information

### **Single-Source-Precursor Synthesis of Dense SiC/HfC<sub>x</sub>N<sub>1-x</sub>-Based Ultrahigh-Temperature Ceramic Nanocomposite**

Qingbo Wen<sup>a</sup>, Yeping Xu<sup>b</sup>, Binbin Xu<sup>c</sup>, Claudia Fasel<sup>a</sup>, Olivier Guillon<sup>d</sup>, Gerd Buntkowsky<sup>b</sup>, Zhaoju Yu<sup>e,f,\*</sup>, Ralf Riedel<sup>a</sup>, Emanuel Ionescu<sup>a</sup>

<sup>a</sup> Technische Universität Darmstadt, Institut für Materialwissenschaft, Jovanka-Bontschits-Straße 2, D-64287, Darmstadt, Germany

<sup>b</sup> Technische Universität Darmstadt, Eduard-Zintl-Institut für Anorganische und Physikalische Chemie, Alarich-Weiss-Straße 4, D-64287, Darmstadt, Germany

<sup>c</sup> College of Chemistry & Chemical Engineering, Xiamen University, Xiamen 361005, China

<sup>d</sup> Otto Schott Institute for Materials Research, Friedrich Schiller University of Jena, Loebdergraben 32, D-07743 Jena, Germany (present address: Forschungszentrum Jülich, Institut für Energie- und Klimaforschung 1: Werkstoffsynthese und Herstellungsverfahren, Wilhelm-Johnen-Straße, D-52425 Jülich)

<sup>e</sup> College of Materials, Key Laboratory of High Performance Ceramic Fibers (Xiamen University), Ministry of Education, Xiamen 361005, China

<sup>f</sup> College of Materials, Fujian Key Laboratory of Advanced Materials, Xiamen University, Xiamen 361005, China

\*Corresponding Author: Zhaoju Yu ([zhaojuyu@xmu.edu.cn](mailto:zhaojuyu@xmu.edu.cn)).

### **Raman Spectroscopy Characterization of SiHfCN-based ceramics**

The Raman spectra of the ceramics pyrolyzed at 1100°C and annealed at different temperature reveal the presence of segregated carbon at all temperatures (Figure S1). In the Raman spectra of SiHfCN-based ceramics, the bands at 1350 cm<sup>-1</sup> and 2700 cm<sup>-1</sup> were assigned to the disorder-induced D band and 2D band (overtone of the D band, also named G' band) respectively, and the band at 1582 cm<sup>-1</sup> assigned to the G mode representing the stretching vibrations of sp<sup>2</sup> carbon in the basal-plane of graphite.<sup>1</sup> The band appearing at 796cm<sup>-1</sup> after annealing at temperatures higher than 1500 °C is the transverse optical (TO) phonon mode of β-SiC.<sup>2</sup> At temperatures lower than 1300 °C, the D and G bands are broad and overlapped due to the high disorder of the segregated carbon phase.<sup>3</sup> With the increasing of annealing temperature from 1400 °C to 1800 °C, the D and G bands become sharper, and

the intensity of 2D ( $G^2$ ) bands grows gradually indicating that the ordering of the segregated carbon phase increases. However, the high intensity of the D band in all recorded spectra indicates in all samples that the carbon phase should be considered as being highly disordered / turbostratic in its nature.

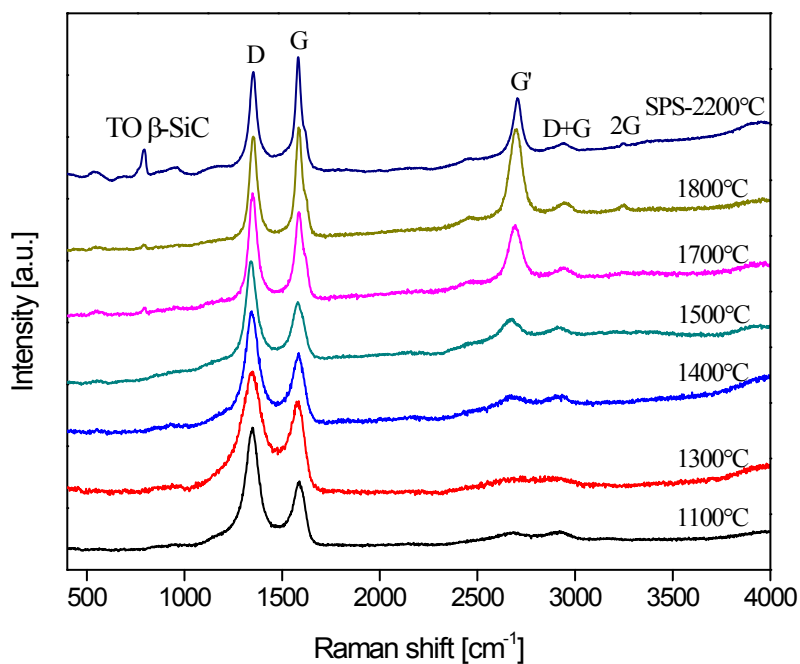

**Figure S1** Raman spectra of SiHfCN-based ceramics annealed at different temperatures.

## REFERENCES

1. R. Nemanich and S. Solin, *Physical Review B*, 1979, **20**, 392.
2. S.-i. Nakashima and H. Harima, *physica status solidi (a)*, 1997, **162**, 39-64.
3. G. Mera, A. Navrotsky, S. Sen, H.-J. Kleebe and R. Riedel, *Journal of Materials Chemistry A*, 2013, **1**, 3826-3836.
